# Supplementary material for: Zero thermal expansion in NaZn13-type La(Fe,Si)13 compounds
Source: Royal Society of Chemistry journal article supplement (doi:10.1039/c4cp04672b), 2014-11-27
Supplement: c4cp04672b1.pdf [file c4cp04672b1.pdf]

**The data points plotted in Figure 3**

| Temperature(K) | $\Delta a/a$ for samples $\text{LaFe}_{13-x}\text{Si}_x$ ( $10^{-6}$ ) |            |            |            |
|----------------|------------------------------------------------------------------------|------------|------------|------------|
|                | x= 1.5                                                                 | x= 1.8     | x= 2.1     | x= 2.4     |
| 300            | 0                                                                      | 0          | 0          | 0          |
| 250            | -12.50021                                                              | 41.02941   | 693.93409  | 297.20588  |
| 220            | 243.62995                                                              | 326.31112  | 2273.59311 | 694.85294  |
| 210            | 521.19407                                                              | 743.98935  | 2956.1941  | 1342.27015 |
| 200            | 876.47059                                                              | 3093.4294  | 3391.21057 | 1625.40526 |
| 180            | 4637.67006                                                             | 4470.02724 | 3740.79295 | 1899.26471 |
| 150            | 4985.71284                                                             | 4543.99109 | 3894.22561 | 2134.41176 |
| 100            | 5294.55882                                                             | 4745.88235 | 4011.04366 | 2206.17647 |
| 70             | 5501.02941                                                             | 4914.11765 | 4131.34882 | 2235.73529 |
| 60             | 5562.20588                                                             | 4974.72177 | 4157.05882 | 2233.82353 |
| 50             | 5598.52941                                                             | 5049.85294 | 4183.82353 | 2249.11765 |
| 40             | 5640.03327                                                             | 5103.38235 | 4220.14706 | 2256.76471 |
| 30             | 5682.64706                                                             | 5132.05882 | 4264.11765 | 2251.02941 |
| 21             | 5720.88235                                                             | 5166.47059 | 4294.70588 | 2249.11765 |
| 15             | 5740.96568                                                             | 5193.13267 | 4302.35294 | 2247.20588 |
